# Supplementary material for: Recombinant origin and interspecies transmission of a HERV-K(HML-2)-related primate retrovirus with a novel RNA transport element
Source: eLife. 2024 Jul 22;13:e80216. doi: 10.7554/eLife.80216 (PMC11379458; doi:10.7554/eLife.80216)
Supplement: Figure 1—source data 1. — Table with genomic coordinates, assembly each provirus was identified in, orientation, intact open reading frames (ORFs), oldest common ancestor insertion was identified in, and presence of shared deletions for each locus analyzed in this paper. Incomplete ORFs longer than 90% of full-length ORF marked with an asterisk. [file elife-80216-fig1-data1.xlsx]

## Sheet: Sheet1
Name/s	Assembly	Chr	Start	End	Orientation	ORFs	Oldest Common Ancestor	Insertionally polymorphic	Shared Deletions
SERV-K1	N/A	chr12	88113733	88113729	+	gag,env	RM	yes
	rheMac10	chr1	40686995	40692008	+		GSM
	rheMac10	chr1	43460675	43466128	+		CEM		env,pro-pol
	rheMac10	chr1	86244445	86248084	-		BAB
	rheMac10	chr1	89359330	89369702	-	pro	AGM
	rheMac10	chr1	95362649	95368042	+	gag	RM		env,pro-pol
	rheMac10	chr1	103186718	103201122	+		GSM
	rheMac10	chr1	112693296	112699956	-	gag,pro	CEM		env
	rheMac10	chr1	179656574	179664222	-		RM		env
	rheMac10	chr1	211743763	211746038	-		CEM
	rheMac10	chr1	222894556	222902182	-	pro	RM		env
	rheMac10	chr1	223049852	223055247	-		RM		env,pro-pol
	rheMac10	chr10	12226352	12231726	-		RM		env,pro-pol
	rheMac10	chr10	12446716	12452720	-	env	RM
	rheMac10	chr10	39089159	39094550	+		RM		env,pro-pol
	rheMac10	chr11	6478714	6484103	-		RM		env,pro-pol
	rheMac10	chr11	68823163	68831720	-		GSM
	rheMac10	chr11	85209124	85213546	-		GSM
	rheMac10	chr11	92407721	92413793	+	pro*	RM		env
	rheMac10	chr11	111501530	111511109	+	gag*,env	CEM
	rheMac10	chr11_NW_021160267v1_random	42902	48318	-		RM		env,pro-pol
	rheMac10	chr12	43295880	43301280	+		CEM		env,pro-pol
	rheMac10	chr12	93614932	93621439	-		RM
	rheMac10	chr13	17763394	17770768	-		GSM
	rheMac10	chr13	66145097	66150415	+	gag	RM		env
	rheMac10	chr14	335346	342983	-	gag	RM		env
	rheMac10	chr14	360109	367799	+	pro	RM		env
	rheMac10	chr14	9169782	9175171	-	gag	RM	yes	env,pro-pol
	rheMac10	chr14	118513488	118517561	+		RM		env
	rheMac10	chr15	44821047	44828684	+		RM		env
	rheMac10	chr16	7266372	7274001	-		RM		env
	rheMac10	chr16	18308502	18318117	-	pro	RM
	rheMac10	chr16	22671659	22676883	-		CEM		env
	rheMac10	chr16	47423957	47429358	-		RM		env,pro-pol
	rheMac10	chr16	60303644	60313226	-	gag,pro,env	RM
	rheMac10	chr16	64092715	64098099	-	gag	RM		env,pro-pol
	rheMac10	chr17	1396545	1401942	-		RM		env,pro-pol
	rheMac10	chr17	31092823	31103940	-		GSM
	rheMac10	chr19	11641546	11650597	-		GSM
	rheMac10	chr19	18145532	18150932	+		RM	yes	env,pro-pol
	rheMac10	chr19	19444977	19447124	+		ND
	rheMac10	chr19	19455165	19462726	+		BAB
	rheMac10	chr19	42111580	42119290	-	pol	RM		env
	rheMac10	chr19	52141425	52150922	-	pro	BAB
	rheMac10	chr2	36922	41560	-		BAB
	rheMac10	chr2	55496314	55501706	-		RM		env,pro-pol
	rheMac10	chr2	153989611	153996530	+		GSM
	rheMac10	chr2	156742530	156751097	+		GSM
	rheMac10	chr2	161205119	161207755	-		GSM
	rheMac10	chr20	1807057	1812468	-		RM		env,pro-pol
	rheMac10	chr20	2853941	2861580	-	pro,pol	RM		env
	rheMac10	chr3	22840243	22842800	-		GSM
	rheMac10	chr3	39813205	39818590	+		RM		env,pro-pol
	rheMac10	chr3	47611074	47616448	+		RM		env
	rheMac10	chr3	48283514	48288918	+		RM		env,pro-pol
	rheMac10	chr3	57697479	57707105	+	gag,pro,env	RM
	rheMac10	chr3	118629380	118637089	-	gag,pol	RM		env
	rheMac10	chr3	176305313	176310766	+		RM		env,pro-pol
	rheMac10	chr4	24031084	24033688	+		CEM
	rheMac10	chr4	60766397	60771274	-	gag	RM		env,pro-pol
	rheMac10	chr4	66099034	66104408	-		RM		env,pro-pol
	rheMac10	chr4	99646059	99651408	+	gag	RM		env,pro-pol
	rheMac10	chr4	99660998	99670572	-	pro*	RM
	rheMac10	chr4	109174158	109181465	+		RM		pro-pol
	rheMac10	chr4	119635324	119642967	-	gag,pro,pol	RM		env
	rheMac10	chr4_NW_021160156v1_random	13281	18673	+		RM		env,pro-pol
	rheMac10	chr5	487323	499354	+		AGM
	rheMac10	chr5	50825196	50830592	-		GSM
	rheMac10	chr5	85732018	85742780	+		GSM
	rheMac10	chr5	146519352	146524758	-	gag	RM		env,pro-pol
	rheMac10	chr5	178535817	178538484	-		BAB
	rheMac10	chr5	185615249	185621927	-		CEM		env
	rheMac10	chr6	42073170	42077892	-	gag	AGM
	rheMac10	chr6	71621468	71626833	-	gag*	RM		env,pro-pol
	rheMac10	chr7	366433	371782	+	gag	CEM		env
	rheMac10	chr7	39176888	39182295	-	gag	RM		env,pro-pol
	rheMac10	chr7	113701215	113706513	-		GSM
	rheMac10	chr7	125627094	125634758	+		RM		env
	rheMac10	chr7	164761527	164769188	-		RM		env
	rheMac10	chr7	169513233	169520933	+	pro	RM		env
	rheMac10	chr8	66525809	66528534	+		CEM		env
	rheMac10	chr8	75693911	75701545	+	gag	CEM
	rheMac10	chr8	108561427	108569079	+	gag*	RM		env
	rheMac10	chr8	144697732	144706161	+		BAB
	rheMac10	chr8	144717596	144728981	-	pro	CEM
	rheMac10	chr8	145352703	145359768	-		GSM
	rheMac10	chr9	536759	546662	+	env	CEM
	rheMac10	chr9	41587350	41595029	-		CEM		env
	rheMac10	chr9	58278177	58283567	-		RM		env,pro-pol
	rheMac10	chr9	72154147	72159595	+		RM		env,pro-pol
	rheMac10	chrUn_NW_021160711v1	13948	21464	+		CEM
	rheMac10	chrUn_NW_021161853v1	4119	13683	-	gag,pro*,env	RM
	rheMac10	chrUn_NW_021162898v1	20	4100	+		RM		env
	rheMac10	chrX	1160036	1167682	+		RM		env
	rheMac10	chrX	3424152	3431783	-	gag,pro*,pol	RM		env
	rheMac10	chrX	23617359	23622766	-	gag	RM		env,pro-pol
	rheMac10	chrX	71179851	71185265	+	gag	RM		env,pro-pol
	rheMac10	chrX	80810498	80815896	+	gag	RM		env,pro-pol
	rheMac10	chrX	116856869	116862256	+	gag	RM		env,pro-pol
	rheMac10	chrX	149369112	149376761	+	gag	RM		env
	rheMac10	chrY	4397663	4404946	-		ND		env
	rheMac8	chr1	92121502	92126937	-	gag	RM
	rheMac8	chr14	8928452	8933815	-		CEM
	rheMac8	chr18	21199535	21202468	-		RM
	rheMac8	chr18	38612209	38619871	-	gag,pro,pol	CEM
	rheMac8	chr7	115114403	115119860	-		RM
