# Supplementary material for: Recombinant origin and interspecies transmission of a HERV-K(HML-2)-related primate retrovirus with a novel RNA transport element
Source: eLife. 2024 Jul 22;13:e80216. doi: 10.7554/eLife.80216 (PMC11379458; doi:10.7554/eLife.80216)
Supplement: Figure 3—source data 2. [file elife-80216-fig3-data2.xlsx]

## Sheet: HML-2 human specific
Name	Age (MY)
1p31.1	0.15
3q13.2	0.15
12q13.2	0.319929
5q33.3	0.321847
1q22	0.624703
7p22.1a	0.625118
12q14.1	0.830196
3q27.2	0.938676
6q14.1	0.938676
8q24.3c	0.938676
Xq21.33	0.939676
19p12b	1.00909
11q22.1	1.2529
19p12e	1.56638
22q11.21	1.88841
10p12.1	2.19426

## Sheet: HML-2 gorilla specific
Name	Age (MY)
4.139	0.32
5.55	0.32
9.14	0.32
2A.33	0.47
8.36	0.63
12.26	0.63
17.76	0.63
1.136	0.96
19.23	1.93
3.8	0.15
3.143	0.15
4.1	0.15
8.46	0.15
9.27	0.15
9.32	0.15
9.76	0.15
10.9	0.15
10.135	0.15
11.72	0.15
12.3	0.15
19.11	0.15

## Sheet: SKM11 RM-specific
Name	Age (MY)
10-12226353_RM10	0.25
10-39089160_RM10	0.25
11_NW021160267v1random-42903_RM10	0.25
1-179656575_RM10	0.25
11-92407722_RM10	0.25
1-222894557_RM10	0.25
1-223049853_RM10	0.25
12-93614933_RM10	0.25
14-9169783_RM10	0.25
15-44821048_RM10	0.25
16-60303645_RM10	0.25
16-64092716_RM10	0.25
16-7266373_RM10	0.25
18-38612209RM8	0.25
19-18145533_RM10	0.25
20-1807058_RM10	0.25
20-2853942_RM10	0.25
4_NW021160156v1random-13282_RM10	0.25
4-119635325_RM10	0.25
4-66099035_RM10	0.25
5-146519353_RM10	0.25
7-115114404RM8	0.25
7-125627095_RM10	0.25
7-164761528_RM10	0.25
8-108561428_RM10	0.25
9-58278178_RM10	0.25
SERV-K1	0.25
Un_NW021161853v1-4120_RM10	0.25
X-23617360_RM10	0.25
X-3424153_RM10	0.25
1-43460676_RM10	0.25
3-176305314_RM10	0.25
16-18308503_RM10	0.25
7-169513234_RM10	0.25
3-57697480_RM10	0.25
7-39176889_RM10	0.50083
3-39813206_RM10	0.512132
3-47611075_RM10	0.512308
X-71179852_RM10	0.513472
Un_NW021162898v1-21_RM10	0.572838
14-335347_RM10	0.574025
19-42111581_RM10	0.968354
11-6478715_RM10	1.01269
2-55496315_RM10	1.01547
16-47423958_RM10	1.02445
10-12446717_RM10	1.33603
14-360110_RM10	1.79712
X-149369113_RM10	2.71148

## Sheet: SKM11 non-RM-specific
Name	Age (MY)
1-112693297_RM10	0.5
5-185615250_RM10	0.823147
3-118629381_RM10	0.96
11-111501531_RM10	1.0062
12-43295881_RM10	1.01278
9-536760_RM10	1.6557
9-72154148_RM10	1.96015
9-41587351_RM10	4.03076
13-66145098_RM10	4.40517
1-89359331_RM10	5.4554
5-487324_RM10	6.25271
11-68823164_RM10	6.51616
8-75693912_RM10	6.81975
19-52141426_RM10	7.93109
16-22671660_RM10	8.65816
8-144717597_RM10	9.34399
8-145352704_RM10	10.7489
2-156742531_RM10	10.8516
1-95362650_RM10	13.1212
7-113701216_RM10	14.8502
17-31092824_RM10	20.8074
5-85732019_RM10	25.0725

## Sheet: non-SKM11
Name	Age (MY)
X-2563839_RM10	9.9848
4-56103378_RM10	11.6528
4-126442436_RM10	12.1606
7-167866285_RM10	19.2871
6-173407568_RM10	19.4487
X-70801763_RM10	20.7898
14-1690984_RM10	22.3684
9-126377233_RM10	22.9591
5-81905720_RM10	23.822
Y-1303034_RM10	25.1377
3-53919281_RM10	30.0744
10-69302515_RM10	32.5017
14-6831566_RM10	32.9158
