# Supplementary material for: Recombinant origin and interspecies transmission of a HERV-K(HML-2)-related primate retrovirus with a novel RNA transport element
Source: eLife. 2024 Jul 22;13:e80216. doi: 10.7554/eLife.80216 (PMC11379458; doi:10.7554/eLife.80216)
Supplement: Figure 3—source data 3. — Table with Coriell ID numbers, sex and species of origin for each genomic DNA sample used for PCR screening. [file elife-80216-fig3-data3.xlsx]

## Sheet: Sheet1
Coriell ID	Species	Sex
NG08308	Macaca mulatta	M
NG07108	Macaca mulatta	F
NG07110	Macaca mulatta	F
NG07127	Macaca mulatta	F
NG07128	Macaca mulatta	F
NG08305	Macaca mulatta	M
NG08316	Macaca mulatta	F
NG08320	Macaca mulatta	F
NG08324	Macaca mulatta	F
NG06249	Macaca mulatta	F
NG06252	Macaca mulatta	F
NG06253	Macaca mulatta	F
NG07098	Macaca mulatta	F
NG07107	Macaca mulatta	F
NG07921	Macaca nemestrina	M
NG08452	Macaca nemestrina	M
