# Supplementary material for: Recombinant origin and interspecies transmission of a HERV-K(HML-2)-related primate retrovirus with a novel RNA transport element
Source: eLife. 2024 Jul 22;13:e80216. doi: 10.7554/eLife.80216 (PMC11379458; doi:10.7554/eLife.80216)
Supplement: Figure 4—source data 1. — Table with genomic coordinates, orientation and intact open reading frames (ORFs) for SERV-K/MER11 proviruses identified in the northern white-cheeked gibbon genome assembly. [file elife-80216-fig4-data1.xlsx]

## Sheet: Sheet1
Chr	Start	End	Orientation	ORFs
1a	40704267	40713093	-	none
2	6974892	6984361	-	none
2	10195022	10204752	+	gag, pro
2	53287052	53288880	-	none
2	118249948	118252074	-	none
3	145603263	145614773	-	none
10	73510506	73519945	+	gag, pro, env
17	23411565	23421246	-	pro, env (trunc)
17	49450156	49460006	+	gag, pro
