# Supplementary material for: Recombinant origin and interspecies transmission of a HERV-K(HML-2)-related primate retrovirus with a novel RNA transport element
Source: eLife. 2024 Jul 22;13:e80216. doi: 10.7554/eLife.80216 (PMC11379458; doi:10.7554/eLife.80216)
Supplement: Figure 5—source data 1. — Table with genomic coordinates and orientation of SERV-K/MER11 proviruses identified in the golden snub-nosed monkey genome assembly. [file elife-80216-fig5-data1.xlsx]

## Sheet: golden snub-nosed monkey prov
Contig	Start	End	Orientation
KN297659v1	1510552	1520325	-
KN294451v1	1092577	1103793	+
KN298745v1	1137406	1148370	-
KN300000v1	786534	797049	-
KN294351v1	223308	233219	-
KN298305v1	572195	581674	+
KN297595v1	21407	30193	-
KN298376v1	191547	200250	-
KN298376v1	485253	495430	+
KN299223v1	256284	264075	+
KN299114v1	35794	43241	-
JABR01028894v1	695	7833	+
KN299503v1	594990	601817	-
KN300287v1	666714	672319	+
