# Supplementary material for: Recombinant origin and interspecies transmission of a HERV-K(HML-2)-related primate retrovirus with a novel RNA transport element
Source: eLife. 2024 Jul 22;13:e80216. doi: 10.7554/eLife.80216 (PMC11379458; doi:10.7554/eLife.80216)
Supplement: Figure 7—source data 3. — Table with flow cytometry data including eGFP and mCherry mean fluorescence intensities used to calculate RNA transport activity. [file elife-80216-fig7-data3.xlsx]

## Sheet: MER11_analysis
Sample	condition	P1,Freq. of Parent	P1/P2,Freq. of Parent	P1/P2/GFP_or_mCherry_pos,Freq. of Parent	P1/P2/GFP_or_mCherry_pos,Mean,<FITC-A>,GFP	P1/P2/GFP_or_mCherry_pos,Mean,<PE-Texas Red-A>,mCherry	P1/P2/Q1: mCherryﾑ,, GFP+,Freq. of Parent	P1/P2/Q2: mCherry+,, GFP+,Freq. of Parent	P1/P2/Q3: mCherry+,, GFPﾑ,Freq. of Parent	P1/P2/Q4: mCherryﾑ,, GFPﾑ,Freq. of Parent	eGFP/mCherry
1: 050321_1_001.fcs	untransf	33.9	98.4	0	･	･	0	0	0	100
2: 050321_2_002.fcs	GFP	45.8	98	23	799	6.8	23.4	0.022	0	76.6	117.5
3: 050321_3_003.fcs	mCherry	31.2	98.6	75.2	26.7	8118	0	0.033	75.4	24.6	0.00328899
4: 050321_4_004.fcs	RcRE+Rec	41.7	97.7	42	4555	3983	2.97	23.5	16.3	57.2	1.14361
5: 050321_5_005.fcs	RcRE+Rec	41.9	97.8	43.9	4288	4440	2.22	22.9	19.6	55.3	0.965766
6: 050321_6_006.fcs	RcRE+Rec	38.1	98.2	46.9	4697	5265	2.06	24.6	21.2	52.2	0.892118
7: 050321_7_007.fcs	RcRE+sRec	31.1	97.6	47.2	111	3700	0	2.67	45.3	52.1	0.03
8: 050321_8_008.fcs	RcRE+sRec	31.8	97.3	45.4	108	4165	0.032	3.52	42.4	54	0.0259304
9: 050321_9_009.fcs	RcRE+sRec	37.6	97.2	49.8	103	5384	0	4.15	46.3	49.5	0.0191308
10: 050321_10_010.fcs	RcRE	44.7	97	45.2	128	4774	0.13	4.61	41.1	54.2	0.0268119
11: 050321_11_011.fcs	RcRE	41.6	98	47.4	84.7	5068	0.011	3.54	44.5	52	0.0167127
12: 050321_12_012.fcs	RcRE	40.2	97.7	49	92.1	4997	0.023	3.57	45.9	50.5	0.0184311
13: 050321_13_013.fcs	MER11U3R+sRec	41.4	97.4	34.6	7269	1356	12.5	22	0.65	64.8	5.36062	1241.67	1226.83
14: 050321_14_014.fcs	MER11U3R+sRec	45.6	97.5	34.3	7355	1172	12.9	21.5	0.53	65.1	6.2756
15: 050321_15_015.fcs	MER11U3R+sRec	42.3	97.3	37.8	7067	1197	14.4	23.3	0.73	61.6	5.90393
16: 050321_16_016.fcs	MER11U3R	37.3	98	39.3	6748	1174	14.4	24.7	0.78	60.1	5.74787	1212
17: 050321_17_017.fcs	MER11U3R	36.3	97.8	36.2	7137	1299	13	22.9	0.87	63.3	5.49423
18: 050321_18_018.fcs	MER11U3R	35.7	97.9	38.2	6819	1163	14.5	23.5	0.87	61.1	5.86328
19: 050321_19_019.fcs	MER11+sRec	30.6	98.5	36.7	5016	2532	4.32	27.9	4.95	62.9	1.98104	2376.33	2257.67
20: 050321_20_020.fcs	MER11+sRec	35.3	97.7	32	4886	1883	6.79	23.2	2.61	67.4	2.5948
21: 050321_21_021.fcs	MER11+sRec	40.4	97.8	33.3	5570	2022	6.45	24.7	2.59	66.2	2.7547
22: 050321_22_022.fcs	MER11	27.9	97.8	29	5942	2714	3.87	21.9	3.67	70.6	2.18939	2139
23: 050321_23_023.fcs	MER11	35.5	98.1	33	5115	2078	6.33	24.4	3.06	66.2	2.4615
24: 050321_24_024.fcs	MER11	35.9	96.6	30.3	4682	1625	5.77	22.5	2.45	69.3	2.88123
25: 050321_25_025.fcs	MER11LTR+sRec	42.8	97.4	27.2	859	3674	0.18	8.87	18.6	72.3	0.233805
26: 050321_26_026.fcs	MER11LTR+sRec	40.1	97.8	27.7	746	3289	0.16	7.87	20.2	71.8	0.226817
27: 050321_27_027.fcs	MER11LTR+sRec	39.2	97.9	33.1	699	3955	0.084	10.1	23.4	66.4	0.176738
28: 050321_28_028.fcs	MER11LTR	34.8	98	37.5	602	4454	0.085	11.1	26.8	62	0.135159
29: 050321_29_029.fcs	MER11LTR	35.9	97.8	33.7	745	4202	0.11	10.4	23.6	65.8	0.177297
30: 050321_30_030.fcs	MER11LTR	38.3	97.9	31.9	662	3630	0.088	9.43	22.9	67.6	0.182369
31: 050321_31_031.fcs	MPMV CTE	38.4	97.8	51.9	277	5112	0.077	8.95	43.6	47.4	0.0541862
32: 050321_32_032.fcs	MPMV CTE	45.4	97.4	49.2	373	4756	0.088	10.6	39.2	50.1	0.0784272
33: 050321_33_033.fcs	MPMV CTE	38.6	97.1	54	312	5382	0.054	9.68	45	45.2	0.057971
Mean		38.1	97.7	38.7	2934	3393	4.45	14	20.8	60.8
StdDev		4.6	0.43	12.3	2858	1797	6.18	9.38	20.1	12.4
