# Supplementary material for: Recombinant origin and interspecies transmission of a HERV-K(HML-2)-related primate retrovirus with a novel RNA transport element
Source: eLife. 2024 Jul 22;13:e80216. doi: 10.7554/eLife.80216 (PMC11379458; doi:10.7554/eLife.80216)
Supplement: Figure 8—source data 1. — Table with flow cytometry data including percent eGFP expressing cells for each experimental replicate. [file elife-80216-fig8-data1.xlsx]

## Sheet: Flow Scheme 2024.05.12
ZW Samples fixed on 2024MAY10 at 4PM													+	-
	Cell Type	GFP	R-PE	Notes	Exp Condition	Replicate	Column5	Transfection	Infection	Column1	293T | Freq. of Parent	293T/Single Cells | Freq. of Parent	293T/Single Cells/GFP+ | Freq. of Parent	293T/Single Cells/GFP- | Freq. of Parent	GFP+ | Freq. of Parent	GFP- | Freq. of Parent	Column2
110	HEK293T	Positive		Positive Control	11	0	dCTE	1	producer cells	051324_110_001.fcs	58.7	96.3	90.6	9.37	91.8	8.19
111	HEK293T	Negative		Negative Control	11	1	dCTE	1	1	051324_111_002.fcs	35	95.8	0.03	100	3.44	96.6
112	HEK293T	Negative		Negative Control	11	2	dCTE	1	2	051324_112_003.fcs	34.4	95.2	0	100	4.57	95.4
113	HEK293T	Negative		Negative Control	11	3	dCTE	1	3	051324_113_004.fcs	36.4	95.1	0.058	99.9	3.19	96.8
120	HEK293T	Positive		Positive Control	12	0	dCTE	2	producer cells	051324_120_005.fcs	53.2	95.3	90.6	9.43	93.1	6.92
121	HEK293T	Negative			12	1	dCTE	2	1	051324_121_006.fcs	33.1	95.7	0.032	100	4.32	95.7
122	HEK293T	Negative			12	2	dCTE	2	2	051324_122_007.fcs	31.6	96.2	0.033	100	3.72	96.3
123	HEK293T	Negative			12	3	dCTE	2	3	051324_123_008.fcs	33.8	95.7	0.031	100	2.95	97
130	HEK293T	Positive		Positive Control	13	0	dCTE	3	producer cells	051324_130_009.fcs	55.9	95.8	90.4	9.6	92.8	7.24
131	HEK293T	Negative			13	1	dCTE	3	1	051324_131_010.fcs	32.5	95.4	0.032	100	4.41	95.6
132	HEK293T	Negative			13	2	dCTE	3	2	051324_132_011.fcs	31.9	94.8	0.066	99.9	4.42	95.6
133	HEK293T	Negative			13	3	dCTE	3	3	051324_133_012.fcs	30.2	95	0.035	100	5.02	95
210	HEK293T	Positive		Positive Control	21	0	dCTE + VSVg	1	producer cells	051324_210_013.fcs	47.2	95.9	81.9	18.1	86.1	13.9
211	HEK293T	Positive			21	1	dCTE + VSVg	1	1	051324_211_014.fcs	34.9	95	0.15	99.8	3.35	96.6
212	HEK293T	Positive			21	2	dCTE + VSVg	1	2	051324_212_015.fcs	29.1	94.8	0.15	99.9	6.13	93.9
213	HEK293T	Positive			21	3	dCTE + VSVg	1	3	051324_213_016.fcs	30.7	95.8	0	100	4.62	95.4
220	HEK293T	Positive		Positive Control	22	0	dCTE + VSVg	2	producer cells	051324_220_017.fcs	57.5	96.9	90.6	9.39	91.2	8.81
221	HEK293T	Positive			22	1	dCTE + VSVg	2	1	051324_221_018.fcs	34.1	95.3	0	100	3.07	96.9
222	HEK293T	Positive			22	2	dCTE + VSVg	2	2	051324_222_019.fcs	29	95.5	0.036	100	4.04	96
223	HEK293T	Positive			22	3	dCTE + VSVg	2	3	051324_223_020.fcs	30	95.6	0.07	99.9	4.71	95.3
230	HEK293T	Positive		Positive Control	23	0	dCTE + VSVg	3	producer cells	051324_230_021.fcs	46.4	96.8	86.3	13.7	89.3	10.7
231	HEK293T	Positive			23	1	dCTE + VSVg	3	1	051324_231_022.fcs	31	94.7	0.034	100	4.41	95.6
232	HEK293T	Positive			23	2	dCTE + VSVg	3	2	051324_232_023.fcs	33.7	93.5	0.032	100	4.64	95.4
233	HEK293T	Positive			23	3	dCTE + VSVg	3	3	051324_233_024.fcs	31.2	95.4	0.1	99.9	3.43	96.6
310	HEK293T	Positive		Positive Control	31	0	WT	1	producer cells	051324_310_025.fcs	51.2	96.1	63	37	74.7	25.3
311	HEK293T	Negative			31	1	WT	1	1	051324_311_026.fcs	31.6	96.4	0.099	99.9	3.85	96.2
312	HEK293T	Negative			31	2	WT	1	2	051324_312_027.fcs	32.5	95.5	0	100	2.87	97.1
313	HEK293T	Negative			31	3	WT	1	3	051324_313_028.fcs	31.2	95.2	0	100	3.2	96.8
320	HEK293T	Positive		Positive Control	32	0	WT	2	producer cells	051324_320_029.fcs	52.9	95.7	64.9	35.1	76	24
321	HEK293T	Negative			32	1	WT	2	1	051324_321_030.fcs	34	95.3	0.062	99.9	3.74	96.3
322	HEK293T	Negative			32	2	WT	2	2	051324_322_031.fcs	33.2	96.1	0.19	99.8	2.73	97.3
323	HEK293T	Negative			32	3	WT	2	3	051324_323_032.fcs	31	96.5	0.067	99.9	3.73	96.3
330	HEK293T	Positive		Positive Control	33	0	WT	3	producer cells	051324_330_033.fcs	43.4	95.9	70.3	29.7	81.6	18.4
331	HEK293T	Negative			33	1	WT	3	1	051324_331_034.fcs	30.9	96.2	0.034	100	4.27	95.7
332	HEK293T	Negative			33	2	WT	3	2	051324_332_035.fcs	30.7	95.6	0	100	3.81	96.2
333	HEK293T	Negative			33	3	WT	3	3	051324_333_036.fcs	33.1	95.9	0	100	3.21	96.8
410	HEK293T	Positive		Positive Control	41	0	WT + VSVg	1	producer cells	051324_410_037.fcs	58.2	98.2	92.5	7.51	90.5	9.51
411	HEK293T	Positive			41	1	WT + VSVg	1	1	051324_411_038.fcs	33.4	94.4	15.1	84.9	24.1	75.9
412	HEK293T	Positive			41	2	WT + VSVg	1	2	051324_412_039.fcs	31.9	95.6	15.8	84.2	21.5	78.5
413	HEK293T	Positive			41	3	WT + VSVg	1	3	051324_413_040.fcs	31.9	94.8	14	86	20	80
420	HEK293T	Positive		Positive Control	42	0	WT + VSVg	2	producer cells	051324_420_041.fcs	49.1	96.3	92.2	7.83	90.4	9.59
421	HEK293T	Positive			42	1	WT + VSVg	2	1	051324_421_042.fcs	28.3	95.8	11.6	88.4	19.3	80.7
422	HEK293T	Positive			42	2	WT + VSVg	2	2	051324_422_043.fcs	31.1	95.6	13.2	86.8	21	79
423	HEK293T	Positive			42	3	WT + VSVg	2	3	051324_423_044.fcs	32.6	94.9	12.1	87.9	17.6	82.4
430	HEK293T	Positive		Positive Control	43	0	WT + VSVg	3	producer cells	051324_430_045.fcs	46.3	96.3	95.2	4.84	93.4	6.57
431	HEK293T	Positive			43	1	WT + VSVg	3	1	051324_431_046.fcs	32.5	95.7	9.37	90.6	17.9	82.1
432	HEK293T	Positive			43	2	WT + VSVg	3	2	051324_432_047.fcs	30.8	96.2	8.63	91.4	15.7	84.3
433	HEK293T	Positive			43	3	WT + VSVg	3	3	051324_433_048.fcs	32.4	95.9	8.58	91.4	14.6	85.4
510	HEK293T	Positive		Positive Control	51	0	MER11	1	producer cells	051324_510_049.fcs	50.5	96.7	67.2	32.8	77.7	22.3
511	HEK293T	Negative			51	1	MER11	1	1	051324_511_050.fcs	31.6	96.6	0.066	99.9	4.41	95.6
512	HEK293T	Negative			51	2	MER11	1	2	051324_512_051.fcs	31	96.4	0	100	4.65	95.4
513	HEK293T	Negative			51	3	MER11	1	3	051324_513_052.fcs	32.5	95.9	0.064	99.9	4.84	95.2
520	HEK293T	Positive		Positive Control	52	0	MER11	2	producer cells	051324_520_053.fcs	48.6	97.2	75.6	24.4	84	16
521	HEK293T	Negative			52	1	MER11	2	1	051324_521_054.fcs	31.6	96.4	0.033	100	4.76	95.2
522	HEK293T	Negative			52	2	MER11	2	2	051324_522_055.fcs	31.2	96.3	0.1	99.9	3.89	96.1
523	HEK293T	Negative			52	3	MER11	2	3	051324_523_056.fcs	31.6	95.2	0.066	99.9	4.57	95.4
530	HEK293T	Positive		Positive Control	53	0	MER11	3	producer cells	051324_530_057.fcs	57.2	97.7	66.2	33.8	74	26
531	HEK293T	Negative			53	1	MER11	3	1	051324_531_058.fcs	29.4	95.7	0.071	99.9	4.27	95.7
532	HEK293T	Negative			53	2	MER11	3	2	051324_532_059.fcs	30.7	95.9	0	100	4.15	95.9
533	HEK293T	Negative			53	3	MER11	3	3	051324_533_060.fcs	31.5	95.2	0.033	100	3.67	96.3
610	HEK293T	Positive		Positive Control	61	0	MER11 + VSVg	1	producer cells	051324_610_061.fcs	49.2	97.1	92.8	7.2	92.3	7.71
611	HEK293T	Positive			61	1	MER11 + VSVg	1	1	051324_611_062.fcs	32.8	96.1	10.6	89.4	13.9	86.1
612	HEK293T	Positive			61	2	MER11 + VSVg	1	2	051324_612_063.fcs	31	96.7	11.5	88.5	19.2	80.8
613	HEK293T	Positive			61	3	MER11 + VSVg	1	3	051324_613_064.fcs	31	97.1	12.2	87.8	16.4	83.6
620	HEK293T	Positive		Positive Control	62	0	MER11 + VSVg	2	producer cells	051324_620_065.fcs	59.2	97.7	91.8	8.22	89.8	10.2
621	HEK293T	Positive			62	1	MER11 + VSVg	2	1	051324_621_066.fcs	33.1	97.1	9.12	90.9	13.5	86.5
622	HEK293T	Positive			62	2	MER11 + VSVg	2	2	051324_622_067.fcs	33.3	96.3	7.8	92.2	11.9	88.1
623	HEK293T	Positive			62	3	MER11 + VSVg	2	3	051324_623_068.fcs	33.9	97	9.46	90.5	16.4	83.6
630	HEK293T	Positive		Positive Control	63	0	MER11 + VSVg	3	producer cells	051324_630_069.fcs	51.7	97.8	91.2	8.76	90.3	9.68
631	HEK293T	Positive			63	1	MER11 + VSVg	3	1	051324_631_070.fcs	29.1	97.4	4.94	95.1	9.87	90.1
632	HEK293T	Positive			63	2	MER11 + VSVg	3	2	051324_632_071.fcs	30.8	96.9	5	95	13.2	86.8
633	HEK293T	Positive			63	3	MER11 + VSVg	3	3	051324_633_072.fcs	32.2	96.6	5.43	94.6	11.2	88.8

## Sheet: Transfection 2024.05.02
Sample Number	Transfection Code	Plasmid Code	Tetherin Ortholog	Tetherin Antagonist	Plasmid Backbone	Amount Transfected (ug)	Total Amount Transfected (ug)	Proviral Plasmid	Amount Transfected (ug)2	Total Amount Transfected (ug)3	Balance Plasmid	Amount Transfected (ug)3	Total Amount Transfected (ug)2	Notes	Experimental Condition	Replicates	Well Format	Media	GJ Transfection Mix (µL)	Lipofectamine Transfection Mix (µL)2		TRANSFECTION CODE	Antagonist Plasmid Volume	Proviral Plasmid Volume	Balance Plasmid Volume	D0+GenJet Volume	Total GJ/DNA Mix Volume	D0 +Lipofectamine +P300	Total Lipofectamine +P3000 +DNA Mix		Plasmid Volume (uL)	DMEM Volume (mL)	GenJet Volume (uL)	DMEM Volume (mL)2	Lipofectamine 3000 (uL)	P3000 (uL)		Cells to Seed	15M	8M	6M	3M	1M	500K	250K		Tube	Plasmid Name	Tube2
																						B	32	95	0	1309	1435	1324	1451		666	7	210	7	157.5	140		SA	175	75	55	25	10	3.5	2		1	pSARM4 dCTE	1
1.1>1.6	A	1	HEK293T	None	None	0	0	pSARM4 dCTE	1.5	9	pCGCG	0	0	INFp	1	6	6	D10	169.5	171.375		D	32	95	0	1309	1435	1324	1451									Format	T175	T75	10	T25	6	12	24		2	pSARM4 MER11	2
2.1>2.6	B	4|1	HEK293T	VSVg	pcDNA3.1	0.5	3	pSARM4 dCTE	1.5	9	pCGCG	0	0	INFp	2	6	6	D10	226	228.5		F	32	95	0	1309	1435	1324	1451									pQCXIP									3	pSARM4 WT	3
3.1>3.6	C	3	HEK293T	None	None	0	0	pSARM4 WT	1.5	9	pCGCG	0	0	INFp	3	6	6	D10	169.5	171.375		A	0	95	0	979	1074	991	1085									Human									4	VSVg	4
4.1>4.6	D	4|3	HEK293T	VSVg	pcDNA3.1	0.5	3	pSARM4 WT	1.5	9	pCGCG	0	0	INFp	4	6	6	D10	226	228.5		C	0	95	0	979	1074	991	1085									Rhesus									5	AARDVARK oafFC1 Env	5
5.1>5.6	E	2	HEK293T	None	None	0	0	pSARM4 MER11	1.5	9	pCGCG	0	0	INFp	5	6	6	D10	169.5	171.375		E	0	95	0	979	1074	991	1085									Cat									6	BabFC Env	6
6.1>6.6	F	4|2	HEK293T	VSVg	pcDNA3.1	0.5	3	pSARM4 MER11	1.5	9	pCGCG	0	0	INFp	6	6	6	D10	226	228.5		A1	0	0	0	0	0	0	0									Dog									7	BabFC Env (MLV Env CT)	7
																						A2	0	0	0	0	0	0	0									Mouse									8	BabFC Env (SRV3 Env CT)	8
																						A3	0	0	0	0	0	0	0									GP293T									9	BabFC Env V2	9
																						B1	0	0	0	0	0	0	0									HEK293T					36				10	DOG cfFC1 Env	10
																						B2	0	0	0	0	0	0	0									HeLa									11	hBST2	11
																						B3	0	0	0	0	0	0	0									Chimp									12	HERV FC1 Env	12
																						C1	0	0	0	0	0	0	0									Gorilla									13	HERV FC2 Env	13
																						C2	0	0	0	0	0	0	0																		14	HIV1 Vpu	14
																						C3	0	0	0	0	0	0	0																		15	HIV1 Vpu FL (SRV3 Env CT)	15
																						D1	0	0	0	0	0	0	0																		16	HIV1 Vpu FL-A14L (SRV3 Env CT)	16
																						D2	0	0	0	0	0	0	0																		17	HIV1 Vpu MSD (SRV3 Env CT)	17
																						D3	0	0	0	0	0	0	0																		18	HIV1 Vpu MSD-A14L (SRV3 Env CT)	18
																						E1	0	0	0	0	0	0	0																		19	HIV1 VpuFL SRV3 Env CT	19
																						E2	0	0	0	0	0	0	0																		20	HIV1 VpuFL-A14L SRV3 Env CT	20
																						E3	0	0	0	0	0	0	0																		21	HIV1 VpuMSD SRV3 Env CT	21
																						F1	0	0	0	0	0	0	0																		22	HIV1 VpuMSD-A14L SRV3 Env CT	22
																						F2	0	0	0	0	0	0	0																		23	HTLV	23
																						F3	0	0	0	0	0	0	0																		24	HTLV Env	24
																						G	0	0	0	0	0	0	0																		25	LEMUR 2 gmlFC2 Env	25
																						G1	0	0	0	0	0	0	0																		26	mBST2	26
																						G2	0	0	0	0	0	0	0																		27	mBST2 +DDIWK	27
																						G3	0	0	0	0	0	0	0																		28	mBST2 14DDIGG18	28
																						H	0	0	0	0	0	0	0																		29	mBST2 14DDIWG18	29
																						H1	0	0	0	0	0	0	0																		30	mBST2 14DDIWK18	30
																						H2	0	0	0	0	0	0	0																		31	mBST2 14DDMGG18	31
																						H3	0	0	0	0	0	0	0																		32	MLV Env	32
																						i	0	0	0	0	0	0	0																		33	MyrNef BabFC Env CT	33
																						i1	0	0	0	0	0	0	0																		34	MyrNef BabFC Env CT (MLV Env CT)	34
																						I2	0	0	0	0	0	0	0																		35	MyrNef HERV Fc1 Env CT	35
																						J	0	0	0	0	0	0	0																		36	MyrNef HERV Pb1 Env CT	36
																						J1	0	0	0	0	0	0	0																		37	MyrNef HERV T Env CT	37
																						J2	0	0	0	0	0	0	0																		38	MyrNef HERV W Env CT	38
																						K	0	0	0	0	0	0	0																		39	MyrNef MLV Env CT	39
																						K1	0	0	0	0	0	0	0																		40	MyrNef MLV Env CT (BabFC Env CT)	40
																						K2	0	0	0	0	0	0	0																		41	MyrNef PERV A Env CT	41
																						L	0	0	0	0	0	0	0																		42	MyrNef PtERV Env CT	42
																						L1	0	0	0	0	0	0	0																		43	MyrNef SRV3 Env CT	43
																						L2	0	0	0	0	0	0	0																		44	MyrNef-G2A SRV3 Env CT	44
																						M	0	0	0	0	0	0	0																		45	MyrNef-G2A SRV3 Env CT V2	45
																						M1	0	0	0	0	0	0	0																		46	None	46
																						M2	0	0	0	0	0	0	0																		47	pCG-STOP	47
																						N	0	0	0	0	0	0	0																		48	pCGCG	48
																						N1	0	0	0	0	0	0	0																		49	pCIG3N	49
																						N2	0	0	0	0	0	0	0																		50	pLXIN-GFP	50
																						O	0	0	0	0	0	0	0																		51	pSARM4	51
																						O1	0	0	0	0	0	0	0																		52	pSARM4 dPsi EGFP	52
																						O2	0	0	0	0	0	0	0																		53	rBST2	53
																						P	0	0	0	0	0	0	0																		54	rBST2 14GEIWK18	54
																						P1	0	0	0	0	0	0	0																		55	rBST2 14GEMGG18	55
																						P2	0	0	0	0	0	0	0																		56	rBST2 14GEMGK18	56
																						Q	0	0	0	0	0	0	0																		57	rBST2 14GEMWK18	57
																						Q1	0	0	0	0	0	0	0																		58	SIV Nef	58
																						Q2	0	0	0	0	0	0	0																		59	SRV3 Env	59
																						R	0	0	0	0	0	0	0																		60	SRV3 Env (BabFC Env CT)	60
																						R1	0	0	0	0	0	0	0																		61	SRV3 Env (BabFC Env CT) V2	61
																						R2	0	0	0	0	0	0	0																		62	SRV3 Env V2	62
																						S	0	0	0	0	0	0	0																		63	V1EGFP	63
																						S1	0	0	0	0	0	0	0																		64	Victoria Prep	64
																						S2	0	0	0	0	0	0	0
																						T	0	0	0	0	0	0	0
																						T1	0	0	0	0	0	0	0
																						T2	0	0	0	0	0	0	0
																						U	0	0	0	0	0	0	0
																						U1	0	0	0	0	0	0	0
																						U2	0	0	0	0	0	0	0
																						V	0	0	0	0	0	0	0
																						V1	0	0	0	0	0	0	0
																						V2	0	0	0	0	0	0	0
																						W	0	0	0	0	0	0	0
																						W1	0	0	0	0	0	0	0
																						W2	0	0	0	0	0	0	0
																						X	0	0	0	0	0	0	0
																						X1	0	0	0	0	0	0	0
																						X2	0	0	0	0	0	0	0
																						Y	0	0	0	0	0	0	0
																						Y1	0	0	0	0	0	0	0
																						Y2	0	0	0	0	0	0	0
																						Z	0	0	0	0	0	0	0
																						Z1	0	0	0	0	0	0	0
																						Z2	0	0	0	0	0	0	0
																						X	X	X	X	X	X	X	X
[truncated: 21 more columns]
