# Supplementary material for: Recombinant origin and interspecies transmission of a HERV-K(HML-2)-related primate retrovirus with a novel RNA transport element
Source: eLife journal article supplement (doi:10.7554/elife.80216), 2024-07-22

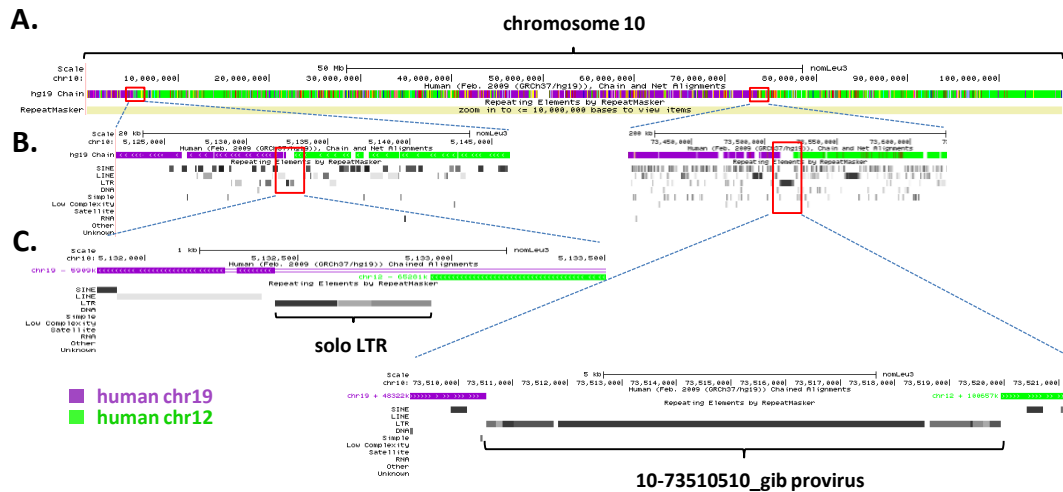

**D.**

10-73510500 5' TSD: TTCATCTGTGGGAAAAGAAA  
 10-5132425 3' TSD: CAGGCCTCCCTTCATTCATC  
 10-5132425 5' TSD: CATTTCTGTGGGAAAAGAAA  
 10-73510500 3' TSD: CAGGTACCCCTTCACATTC

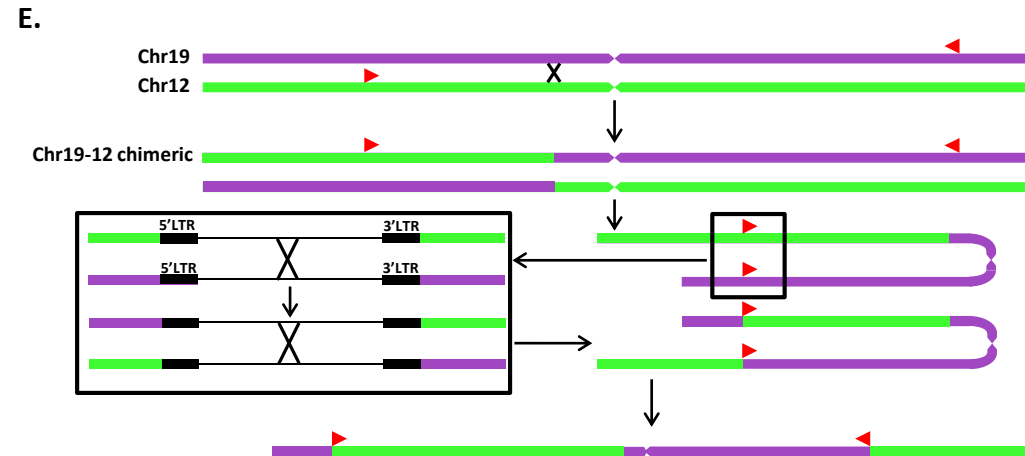

Supplement: supp [file elife-80216-supp-v1.zip]
