# Supplementary material for: Recombinant origin and interspecies transmission of a HERV-K(HML-2)-related primate retrovirus with a novel RNA transport element
Source: eLife journal article supplement (doi:10.7554/elife.80216), 2024-07-22
Supplement: supp [file elife-80216-supp-v1.zip]

A.

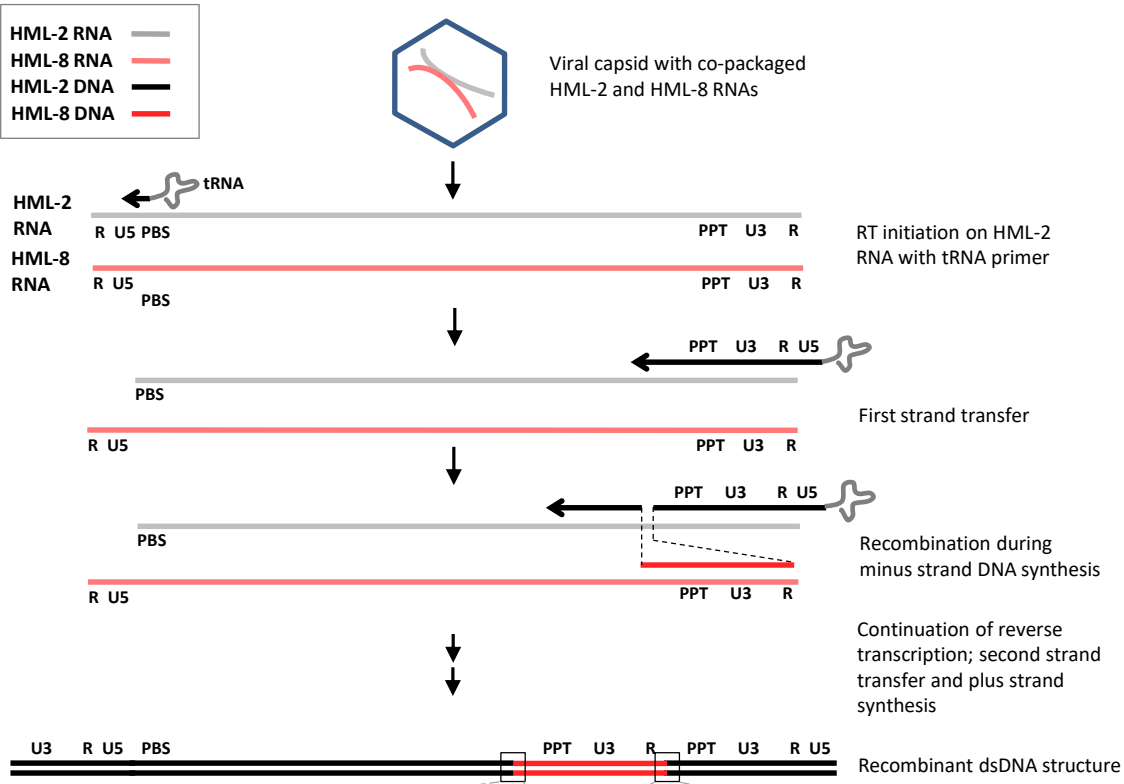

B.

| UPSTREAM JUNCTION |                                     |      | DOWNSTREAM JUNCTION |                                      |      |
|-------------------|-------------------------------------|------|---------------------|--------------------------------------|------|
| SKM11anc:         | GCCATCTACAGGGAAGAGAAGATAATCTCACTTTA |      | SKM11anc:           | CTCCACTTGCTTTGTGATATTTTATTACCTTGTGA  |      |
| HML-2 Env:        | .....                               | 100% | HML-2 Env:          | ACATTTCAAA...AAA.G.ACAA...TT.GAAGC.  | 26%  |
| HML-8 Env:        | .A..C..T.T...T..G.....T.AT.A..G     | 69%  | HML-8 LTR:          | .....                                | 100% |
| SKM11anc:         | GACATTCTAAATTAAAGAACAATTTTGAAGC     |      | SKM11anc:           | AGTATGTG-ATCTCTGTGTTGGTACCAGAACTGA   |      |
| HML-2 Env:        | .....C.....C.....                   | 94%  | HML-2 Env:          | TCA.AAGCCCAT.TAAAT...G...G.....      | 49%  |
| HML-8 Env:        | .....AA.....GA.....                 | 89%  | HML-8 LTR:          | ..C.....A.....ACC-...CCCT.T.TT       | 63%  |
| SKM11anc:         | CTCTCAAGCTCACTTAACATATTGTGCTGGAGCTG |      | SKM11anc:           | GGCAATTCAGGAGTTGTGATGGCCTCGCAAATC    |      |
| HML-2 Env:        | A..AA....C..T...A.T.G....A..A...    | 71%  | HML-2 Env:          | .....                                | 100% |
| HML-8 Env:        | .....T.C.....                       | 94%  | HML-8 LTR:          | TA..C.CC.TCTGC...TTGA.AAT.ACTAAT..AA | 29%  |
