# Supplementary figures and images for: Recombinant origin and interspecies transmission of a HERV-K(HML-2)-related primate retrovirus with a novel RNA transport element
Source: eLife journal article supplement (doi:10.7554/elife.80216), 2024-07-22

**B.**

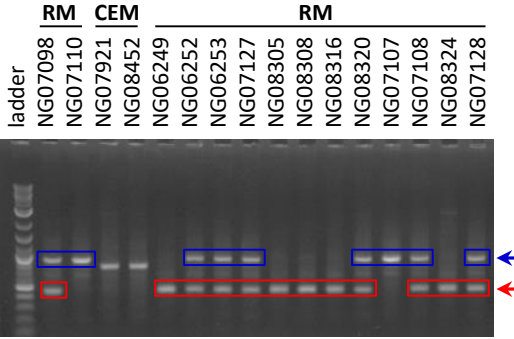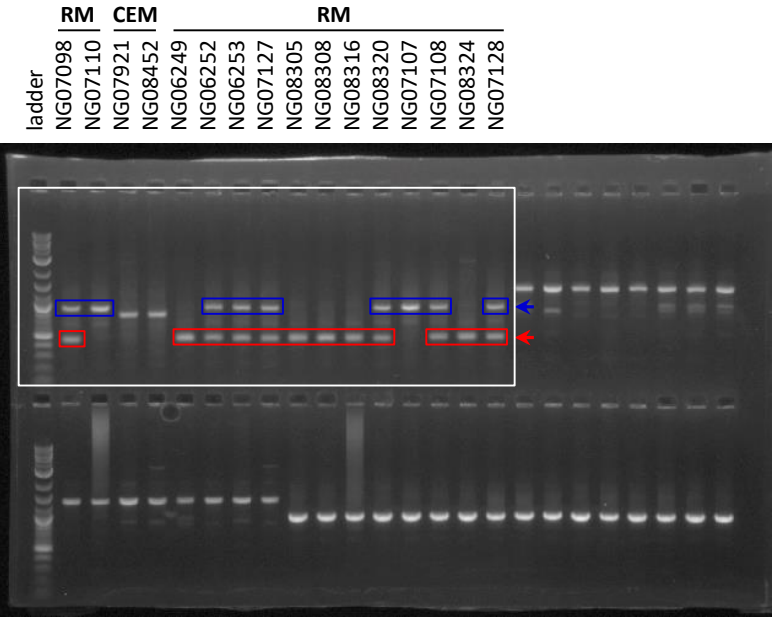

**Figure 3 supplement 1**

Supplement: fig3-figsupp1-data3 [file elife-80216-fig3-figsupp1-data3-v2.zip]

C.

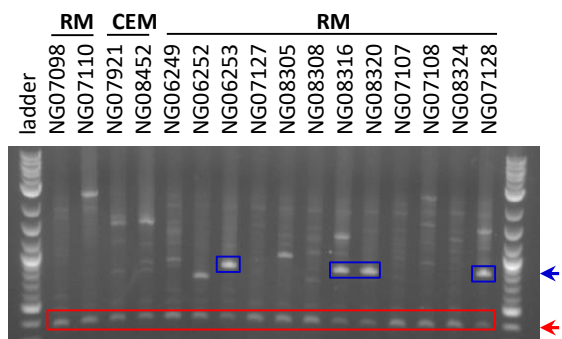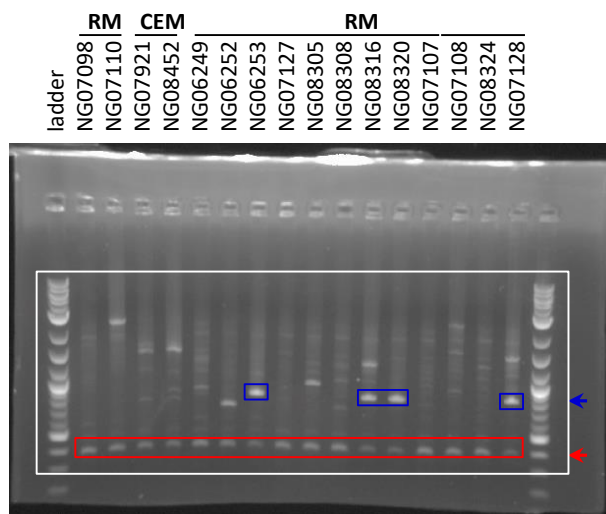

Figure 3 supplement 1

Supplement: fig3-figsupp1-data4 [file elife-80216-fig3-figsupp1-data4-v2.zip]

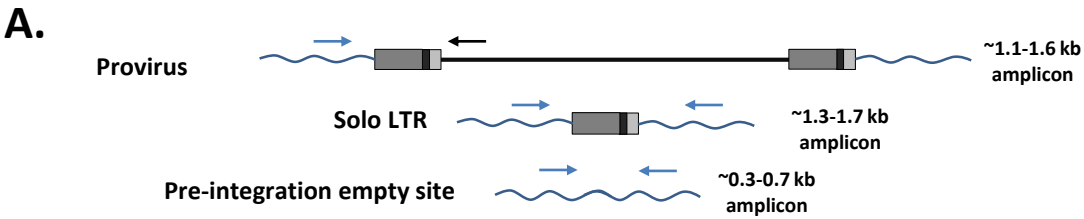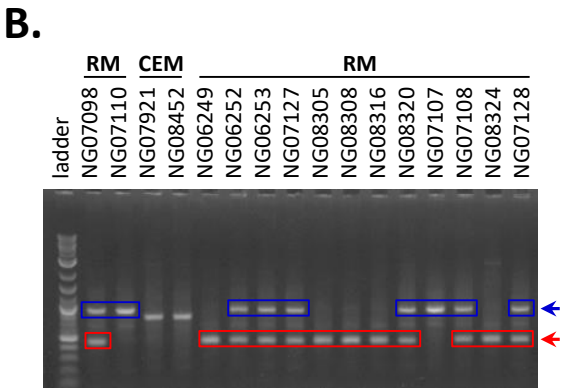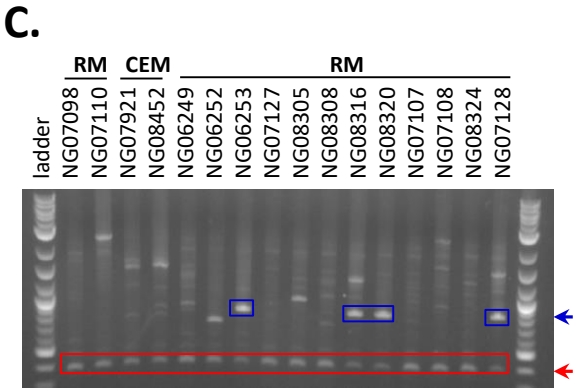

Supplement: supp [file elife-80216-supp-v1.zip]

**A.**

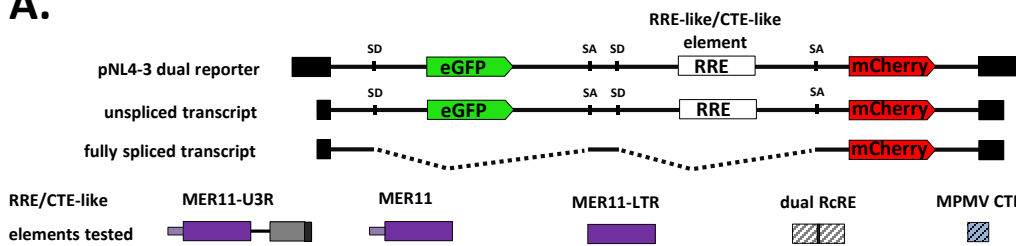

**B.**

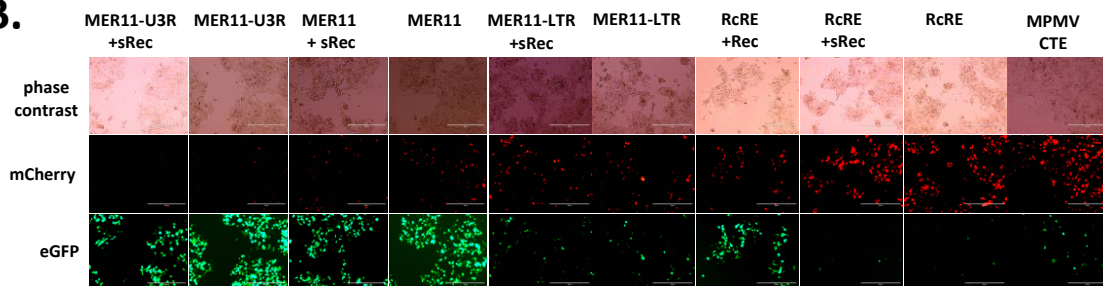

**C.**

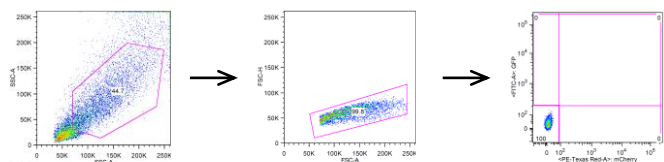

**D.**

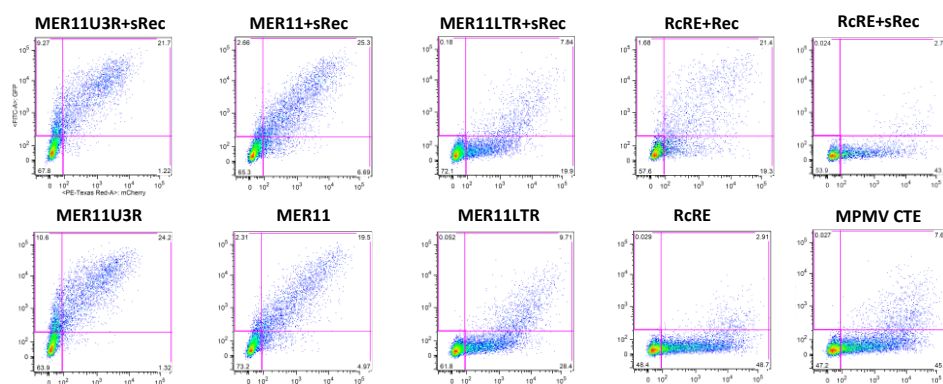

**E.**

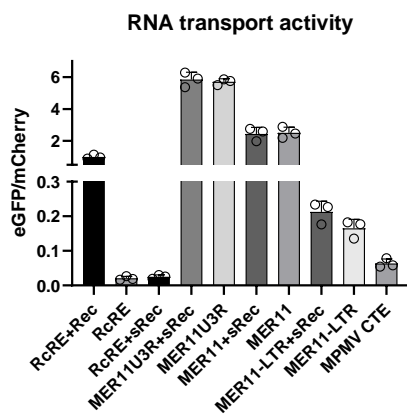

Supplement: supp [file elife-80216-supp-v1.zip]

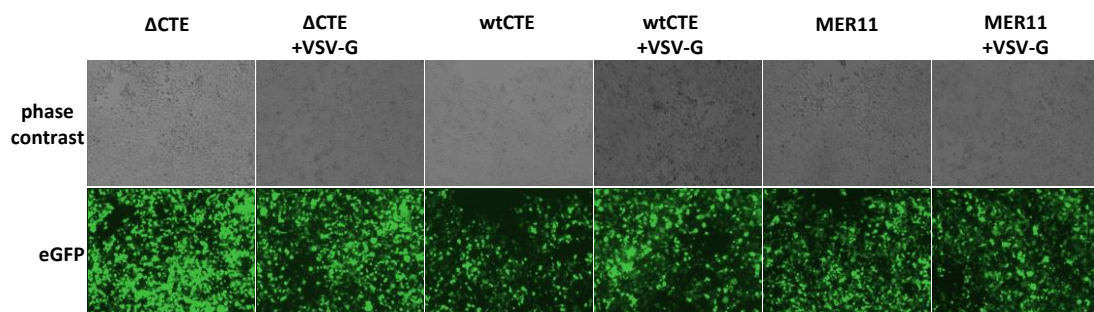

Supplement: supp [file elife-80216-supp-v1.zip]

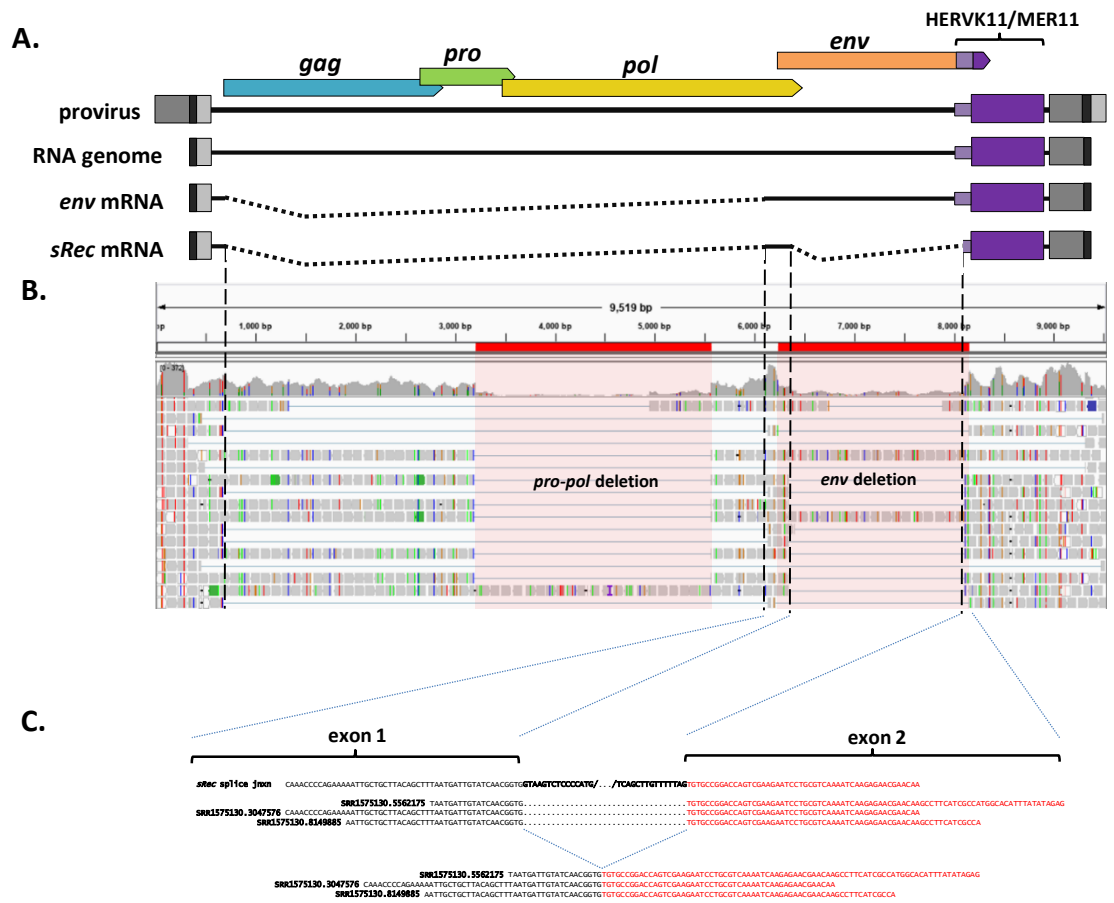

Supplement: supp [file elife-80216-supp-v1.zip]
